# Supplementary material
Source: PubMed Central journal article supplement (PMC7293541)
Supplement: NIHMS1584663-supplement-Fig_S1.pdf [file NIHMS1584663-supplement-Fig_S1.pdf]

**mitochondrial respiratory chain complex I assembly (GO:0032981)**

|         |         |          |          |        |        |        |        |         |
|---------|---------|----------|----------|--------|--------|--------|--------|---------|
| ACAD9   | NDUFA11 | NDUFA8   | NDUF AF5 | NDUFB3 | NDUFB7 | NDUFC2 | NDUFS7 | TAZ     |
| FOXRED1 | NDUFA13 | NDUFA9   | NDUF AF6 | NDUFB4 | NDUFB8 | NDUFS1 | NDUFS8 | TIMMDC1 |
| NDUFA1  | NDUFA2  | NDUF AF1 | NDUFB10  | NDUFB5 | NDUFB9 | NDUFS2 | NDUFV1 |         |
| NDUFA10 | NDUFA6  | NDUF AF3 | NDUFB2   | NDUFB6 | NDUFC1 | NDUFS5 | NUBPL  |         |

**mitochondrial acetyl-CoA biosynthetic process from pyruvate (GO:0061732)**

MPC1  
MPC2  
PDHA1  
PDHB

**ubiquinone biosynthetic process (GO:0006744)**

COQ5  
COQ6  
COQ7  
NDUFA9

**iron-sulfur cluster assembly (GO:0016226)**

FXN            NUBPL  
HSCB  
NARFL  
NFU1

**cholesterol biosynthetic process (GO:0006695)**

ACLY            HSD17B7  
APOA4        NSDHL  
FDFT1        SQLE  
G6PD

**tricarboxylic acid cycle (GO:0006099)**

CS            PDHB  
DLAT  
MDH2  
PDHA1

**protein maturation (GO:0051604)**

CCS            GLRX5            NFU1  
DDI2            HSCB            RCE1  
EP300            HTRA2            XPNPEP3  
FXN            NAA10
