# Supplementary material
Source: PubMed Central journal article supplement (PMC7293541)
Supplement: NIHMS1584663-supplement-Fig_S2.pdf [file NIHMS1584663-supplement-Fig_S2.pdf]

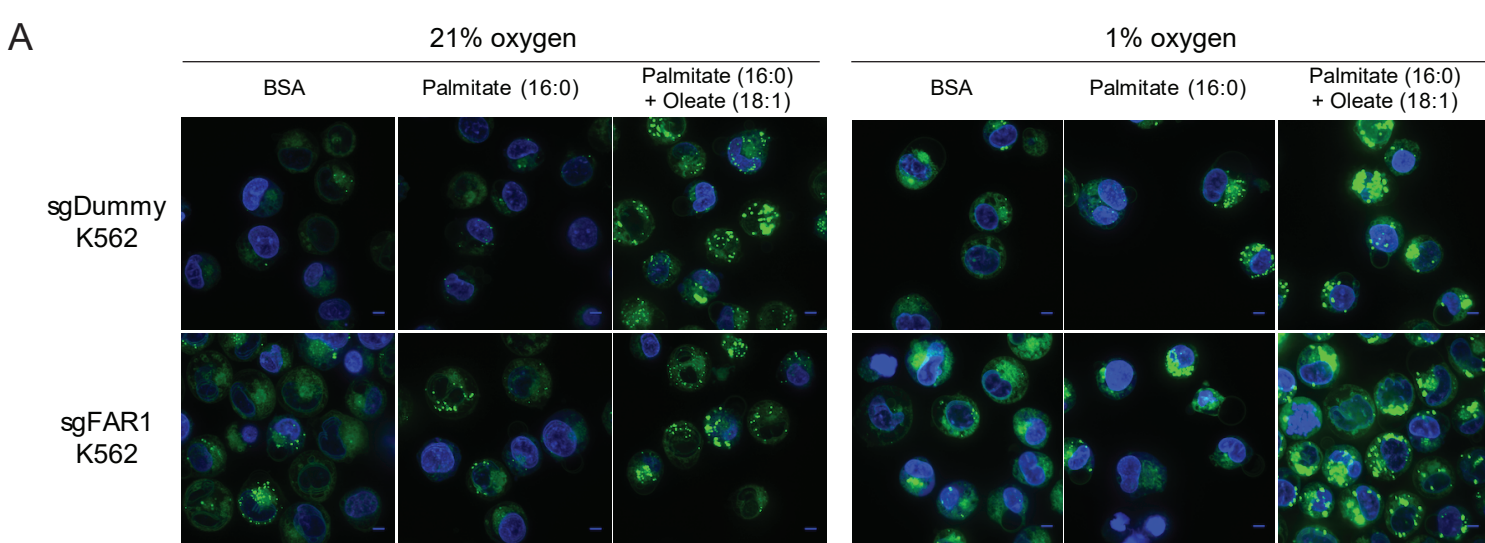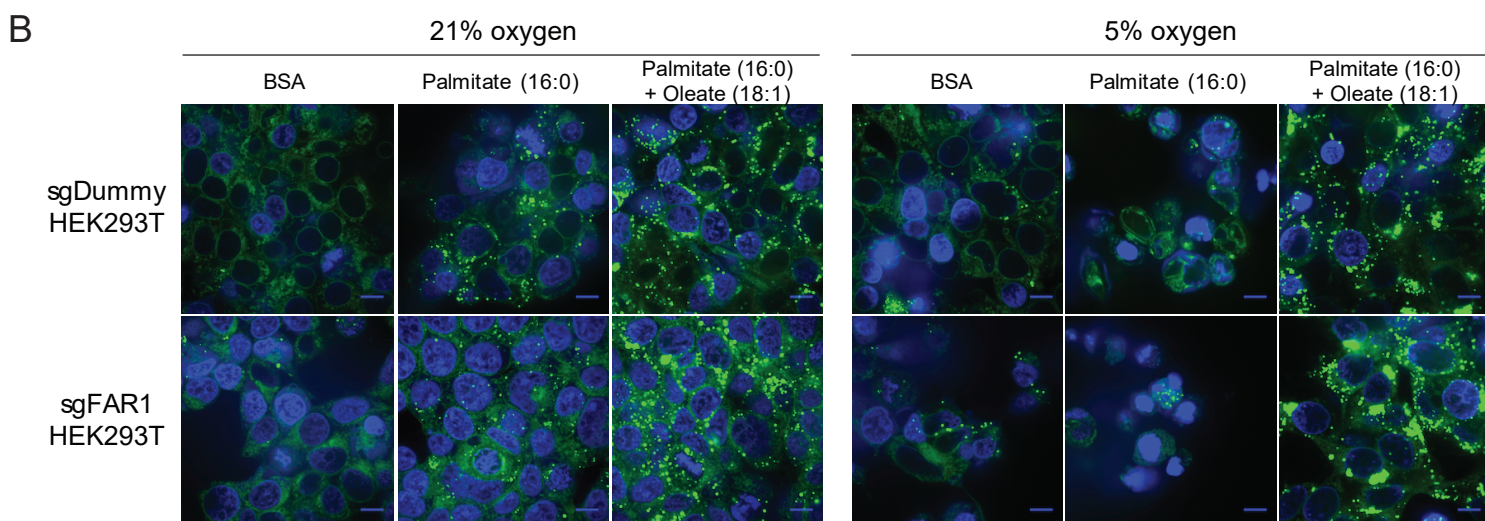

**C**

|                   | C44.0.TAG | C46.0.TAG | C46.1.TAG | C48.1.TAG | C48.2.TAG | C50.0.TAG | C50.2.TAG | C50.3.TAG | C51.2.TAG | C52.1.TAG | C53.2.TAG | C54.2.TAG | C55.0.TAG | C57.1.TAG | C58.1.TAG | C60.2.TAG | C62.3.TAG | C82.11.TAG | C82.12.TAG | C87.6.TAG | C88.6.TAG | C91.14.TAG |
|-------------------|-----------|-----------|-----------|-----------|-----------|-----------|-----------|-----------|-----------|-----------|-----------|-----------|-----------|-----------|-----------|-----------|-----------|------------|------------|-----------|-----------|------------|
| <b>21% oxygen</b> |           |           |           |           |           |           |           |           |           |           |           |           |           |           |           |           |           |            |            |           |           |            |
| sgDummy           | 5         | 7         | 5         | 7         | 5         | 9         | 7         | 4         | 4         | 8         | 4         | 7         | 5         | 5         | 6         | 5         | 3         | 4          | 4          | 6         | 3         | 3          |
| sgPEX5            | 4         | 6         | 5         | 7         | 5         | 8         | 7         | 4         | 4         | 8         | 3         | 7         | 5         | 5         | 6         | 5         | 4         | 0          | 4          | 7         | 4         | 4          |
| sgPEX10           | 5         | 7         | 5         | 8         | 5         | 8         | 7         | 5         | 4         | 9         | 4         | 7         | 5         | 5         | 6         | 5         | 4         | 0          | 4          | 7         | 4         | 4          |
| sgAGPS            | 4         | 6         | 5         | 7         | 5         | 8         | 7         | 4         | 4         | 8         | 4         | 7         | 5         | 5         | 5         | 5         | 4         | 0          | 4          | 7         | 3         | 4          |
| sgFAR1            | 5         | 7         | 6         | 8         | 5         | 9         | 8         | 5         | 4         | 9         | 4         | 8         | 5         | 5         | 6         | 5         | 4         | 0          | 5          | 6         | 3         | 4          |
| <b>5% oxygen</b>  |           |           |           |           |           |           |           |           |           |           |           |           |           |           |           |           |           |            |            |           |           |            |
| sgDummy           | 5         | 7         | 5         | 7         | 4         | 10        | 7         | 4         | 4         | 8         | 4         | 7         | 6         | 5         | 6         | 5         | 3         | 5          | 5          | 6         | 3         | 3          |
| sgPEX5            | 4         | 7         | 4         | 7         | 4         | 10        | 6         | 4         | 3         | 8         | 3         | 7         | 6         | 5         | 6         | 5         | 3         | 3          | 5          | 7         | 3         | 4          |
| sgPEX10           | 5         | 8         | 5         | 7         | 5         | 10        | 7         | 4         | 4         | 9         | 4         | 7         | 6         | 5         | 6         | 5         | 4         | 2          | 5          | 6         | 3         | 4          |
| sgAGPS            | 5         | 7         | 5         | 7         | 4         | 10        | 7         | 4         | 4         | 8         | 3         | 7         | 6         | 5         | 6         | 5         | 3         | 3          | 5          | 6         | 3         | 4          |
| sgFAR1            | 5         | 8         | 5         | 8         | 5         | 10        | 7         | 4         | 4         | 9         | 4         | 7         | 7         | 6         | 6         | 5         | 3         | 3          | 6          | 6         | 3         | 4          |

log2 abundance

|   |   |   |    |
|---|---|---|----|
| 4 | 6 | 8 | 10 |
|---|---|---|----|
