# Supplementary material
Source: PubMed Central journal article supplement (PMC7293541)

GFP-PTS1

Merge

21% O<sub>2</sub>

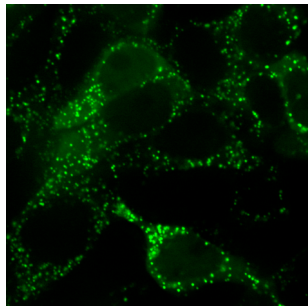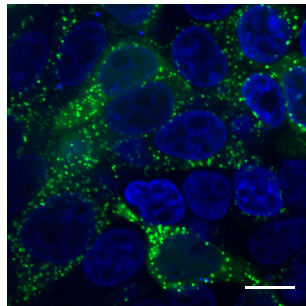

1% O<sub>2</sub>

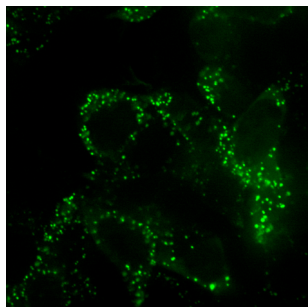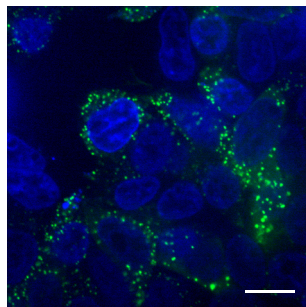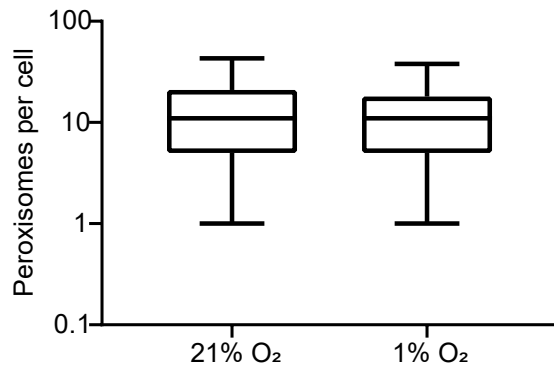

Supplement: NIHMS1584663-supplement-Fig_S3.pdf [file NIHMS1584663-supplement-Fig_S3.pdf]

# Effect of Hypoxia: HEK293T + FAR1 KO

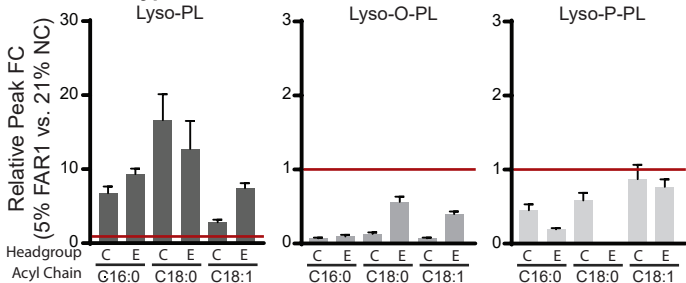

Supplement: NIHMS1584663-supplement-Fig_S4.pdf [file NIHMS1584663-supplement-Fig_S4.pdf]

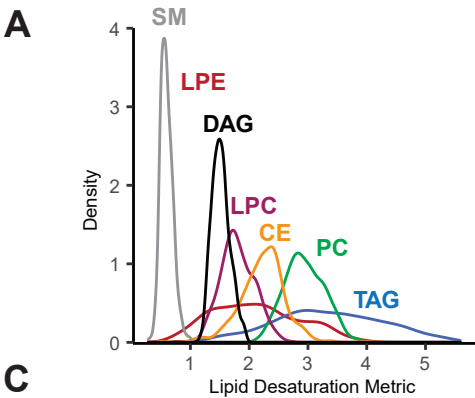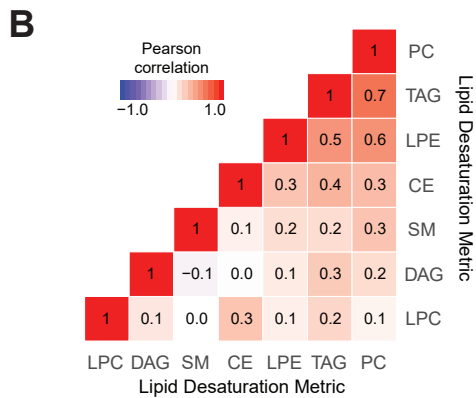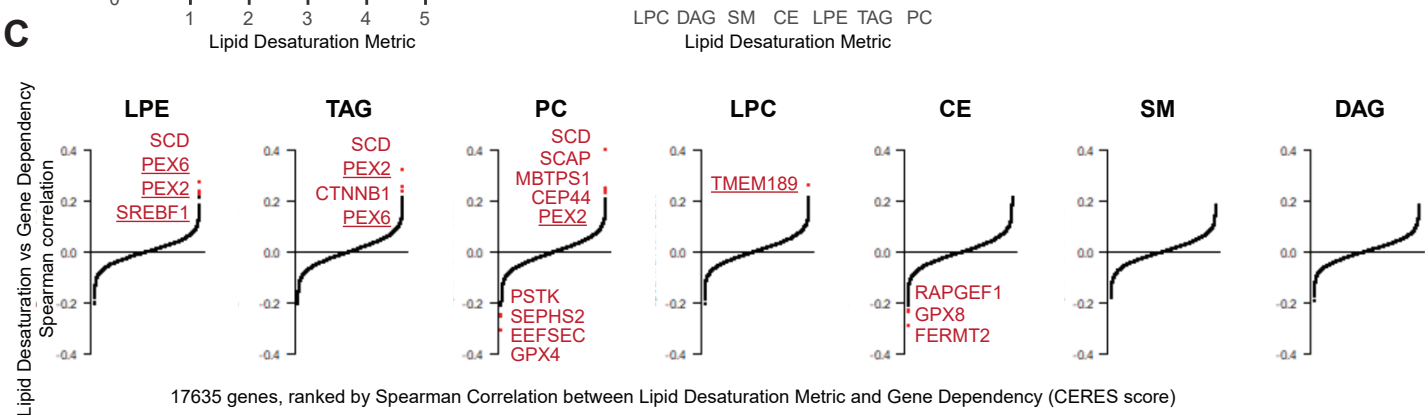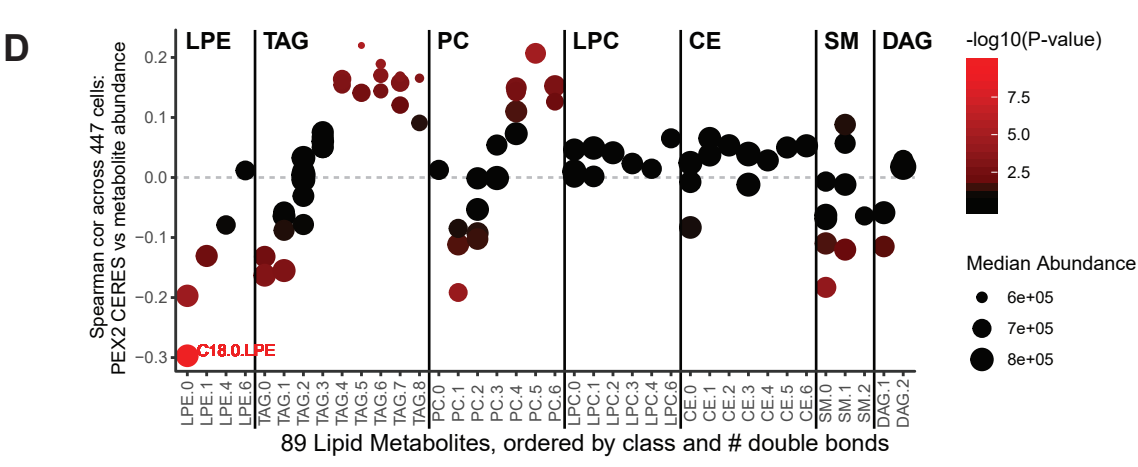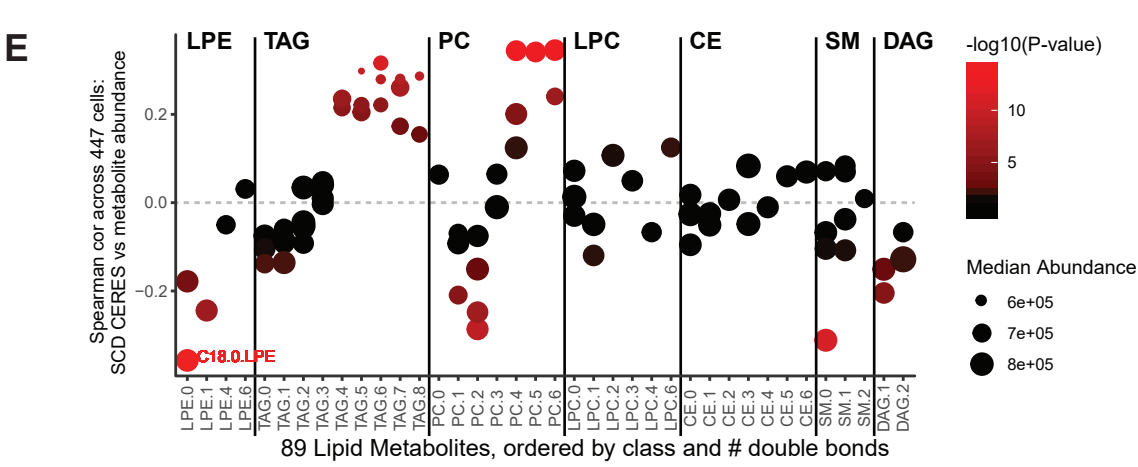

Supplement: NIHMS1584663-supplement-Fig_S5.pdf [file NIHMS1584663-supplement-Fig_S5.pdf]
